# Supplementary material for: Effect of the COVID-19 pandemic on obesity and its risk factors: a systematic review
Source: BMC Public Health. 2023 May 30;23:1018. doi: 10.1186/s12889-023-15833-2 (PMC10227822; doi:10.1186/s12889-023-15833-2)
Supplement: Supplementary file 1 — Additional file 1: Supplementary Table 1. Quality assessment checklist for included cohort studies. [file 12889_2023_15833_MOESM1_ESM.xlsx]

## Sheet: Supplementary Table 1
Supplementary Table 1. Quality assessment checklist for included chohort studies
	NEWCASTLE-OTTOWA QUALITY ASSESSMENT SCALE
S.NO	Author	COHORT STUDIES
		Selection (4*)				comparability of cohort on the basis of the design or analysis (2*)	OUTCOME (3*)			Quality score
		Representativenes of the exposed	selection of non exposed cohort	Ascertainment of exposure	Demonstration of that oucome of interst was not present at start of study	comparability of cohort on the basis of the design or analysis	Assessment of outcome	was flow-up long enough for outcome to occur	Adequecy of follow up of Cohort
1	Maltoni et al	0	1	1	0	2	1	1	1	7
2	Arayess, et al.	0	1	1	0	2	1	1	1	7
3	Dubnov et al	0	1	1	1	2	1	1	1	8
4	Dun, R et al	0	1	1	1	2	0	1	1	7
5	He, Luo et al.	0	1	1	0	2	0	1	1	6
6	Jayatissa, Herath et al.	1	1	1	1	2	1	0	0	7
7	Jia, Zhang et al	0	1	1	1	2	1	1	1	8
8	Myung-Nam Lee et al	1	1	1	0	2	1	1	1	8
9	Wudeneh Mulugetaet al	0	1	1	1	2	1	1	1	8
10	Asmaa M. Namoos et al	0	1	1	0	2	1	1	1	7
11	Barkha P. Patel et al	0	1	1	0	2	1	1	0	6
12	Luigi Barreaet al	0	1	1	0	2	1	1	0	6
13	Anna Vážná et al	0	1	1	0	2	1	1	1	7
14	Paula Sol Ventura et al	0	1	0	0	2	1	1	1	6
15	Marianna Pellegrini et al	0	0	1	0	2	1	1	1	6
										0
