# Supplementary material for: Effect of the COVID-19 pandemic on obesity and its risk factors: a systematic review
Source: BMC Public Health. 2023 May 30;23:1018. doi: 10.1186/s12889-023-15833-2 (PMC10227822; doi:10.1186/s12889-023-15833-2)
Supplement: Supplementary file 3 — Additional file 3: Supplementary Table 3. Quality assessment checklist for included cross-sectional studies. [file 12889_2023_15833_MOESM3_ESM.xlsx]

## Sheet: Supplementary Table 3
Supplementary Table 3. Quality assessment checklist for included cross-sectional studies
Study ID		CROSS-SECTIONAL STUDIES
	Author	Selection (4*)				Comparability (2*)	OUTCOME		Quality score
		represetativeness of sample	Sample size	Ascertainment of exposure	Non-response rate	The subjects in different outcome group are comparable ,based on study design anlysis comfounding are controlled	Assessment of outcome	Reporting result
1	Robinson,et al.	1	0	0	1	2	1	1	6
2	Haddad, et al	1	0	0	1	2	1	1	6
3	Dasdemir,et al.	0	0	1	1	2	1	1	6
4	Boukrim, et al.	0	0	1	1	2	1	1	6
5	Prado et al	0	0	1	0	2	1	1	5
6	Drieskens et al	0	0	1	0	2	1	1	5
7	Eşer Durmaz et al	0	1	1	0	2	1	1	6
8	Gülü, Yapici et al.	1	0	1	1	2	1	1	7
9	Jimenez, de Hollanda et al.	0	1	1	1	2	1	1	7
10	Mai A. Khatibet al	0	1	1	1	2	1	1	7
11	Na-Hye Kim et al	0	1	1	1	2	1	1	7
12	Miguel López-Moreno et al	0	1	0	1	2	1	1	6
13	Mirella Nicodemoet al	0	0	1	1	2	1	1	6
14	Hong Kyu Park et al	0	0	0	1	2	1	1	5
15	I Putu Suiraokaet al	0	1	1	1	2	1	1	7
16	Jana Pyšná	0	1	0	1	2	1	1	6
17	Tereza Sˇ tvera ́ kova	0	1	1	0	2	1	1	6
18	Shujuan Yang et al	0	1	1	0	2	1	1	6
19	Qi Zhu et al	0	1	1	1	2	1	1	7
20	Huda Al Hourani et al	0	0	1	1	2	1	1	6
21	Nassar et al	0	1	1	1	2	1	1	7
22	Vilma K, et al	0	0	1	0	2	1	1	5
23	Daniela Reyes-Olavarría	0	1	1	0	2	1	1	6
24	Haewon Byeon	0	0	0	1	2	1	1	5
